# Supplementary material
Source: PubMed Central journal article supplement (PMC9329182)
Supplement: NIHMS1775945-supplement-Supplementary_Materials__Suppl__Table_1__Suppl__Figure_1-3_.pdf [file NIHMS1775945-supplement-Supplementary_Materials__Suppl__Table_1__Suppl__Figure_1-3_.pdf]

## Supplementary Files

**Supplementary Table 1.** Summary of the most prevalent fusion transcript variants in the literature

**Supplementary Table 2.** Spreadsheet showing differential gene expression of *EWSR1-ATF1*-rearranged clear cell sarcoma compared to other tumor types compared to other tumor types identified on the Affymetrix platform (1.5 log<sub>2</sub> fold change and *P*-value 0.01).

**Supplementary Table 3.** Spreadsheet showing differential methylation of *EWSR1-ATF1* rearranged clear cell sarcoma compared to other tumor types identified on the 850k platform (4 log<sub>2</sub> fold change and *P*-value 0.01).

**Supplementary Figure 1.** Recurrent genetic alterations by *EWSR1/FUS* fusion partner type (*ATF1*, *CREB1*, *CREM*).

**Supplementary Figure 2.** Heatmap showing differential gene expression of *EWSR1-ATF1*-rearranged clear cell sarcoma compared to other tumor types compared to other tumor types identified on the Affymetrix platform (1.5 log<sub>2</sub> fold change and *P*-value 0.01).

**Supplementary Figure 3.** Heatmap showing differential methylation of *EWSR1-ATF1* rearranged clear cell sarcoma compared to other tumor types identified on the 850k platform (4 log<sub>2</sub> fold change and *P*-value 0.01).

**Supplementary Table 1.** Summary of the most prevalent fusion transcript variants in the literature

| Reference                                                                              | Fusion transcript variant                                                                                                                              |
|----------------------------------------------------------------------------------------|--------------------------------------------------------------------------------------------------------------------------------------------------------|
| <b>Angiomatoid fibrous histiocytoma (AFH)</b>                                          |                                                                                                                                                        |
| Waters 2000                                                                            | 1 <i>FUS</i> ex5- <i>ATF1</i> ex5                                                                                                                      |
| Raddaoui 2002                                                                          | 1 <i>FUS</i> ex5- <i>ATF1</i> ex5                                                                                                                      |
| Hallor 2005                                                                            | 1 <i>EWSR1</i> ex7- <i>ATF1</i> ex5                                                                                                                    |
| Antonescu 2007                                                                         | 1 <i>EWSR1</i> ex7- <i>ATF1</i> ex5; 8 <i>EWSR1</i> ex7- <i>CREB1</i> ex7                                                                              |
| Rossi 2007                                                                             | 1 <i>EWSR1-ATF1</i> ; 13 <i>EWSR1</i> ex7- <i>CREB1</i> ex7                                                                                            |
| Yoshida 2019                                                                           | 8 <i>EWSR1-CREB1</i> ; 3 <i>EWSR1-CREM</i> (extracranial myxoid AFH)                                                                                   |
| <b>Summary:</b>                                                                        | 3 <i>EWSR1-ATF1</i> (2 ex7-ex5); 29 <i>EWSR1-CREB1</i> (21 ex7-ex7); 3 <i>EWSR1-CREM</i> ; 2 <i>FUS</i> ex5- <i>ATF1</i> ex5                           |
| <b>Current study:</b>                                                                  | 14 <i>EWSR1-ATF1</i> (3 ex7-ex5; 1 ex7-ex7); 21 <i>EWSR1-CREB1</i> (3 ex7-ex7); 1 <i>EWSR1-CREM</i>                                                    |
| <b>Clear cell sarcoma</b>                                                              |                                                                                                                                                        |
| Antonescu 2002                                                                         | 11 <i>EWSR1</i> ex8- <i>ATF1</i> ex4                                                                                                                   |
| Panagopoulos 2002                                                                      | 8 <i>EWSR1</i> ex8- <i>ATF1</i> ex4; 4 <i>EWSR1</i> ex7- <i>ATF1</i> ex5; 1 <i>EWSR1</i> ex10- <i>ATF1</i> ex5                                         |
| Coindre 2006                                                                           | 24 <i>EWSR1</i> ex8- <i>ATF1</i> ex4; 32 <i>EWSR1</i> ex7- <i>ATF1</i> ex5                                                                             |
| Hisaoka 2008                                                                           | 25 <i>EWSR1</i> ex8- <i>ATF1</i> ex4; 11 <i>EWSR1</i> ex7- <i>ATF1</i> ex5; 4 <i>EWSR1</i> ex10- <i>ATF1</i> ex5; 2 <i>EWSR1</i> ex7- <i>CREB1</i> ex7 |
| Wang 2009                                                                              | 13 <i>EWSR1</i> ex8- <i>ATF1</i> ex4; 6 <i>EWSR1</i> ex7- <i>ATF1</i> ex5; 1 <i>EWSR1-CREB1</i>                                                        |
| Jakubauskas 2011                                                                       | 1 <i>EWSR1</i> ex8- <i>ATF1</i> ex4; 1 <i>EWSR1</i> ex7- <i>ATF1</i> ex5; 1 <i>EWSR1</i> ex7- <i>ATF1</i> ex4; 1 <i>EWSR1</i> ex9- <i>ATF1</i> ex4;    |
| Segawa 2018                                                                            | 3 <i>EWSR1</i> ex8- <i>ATF1</i> ex4; 1 <i>EWSR1</i> ex8- <i>ATF1</i> ex5; 2 <i>EWSR1</i> ex10- <i>ATF1</i> ex5                                         |
| Yoshida 2019                                                                           | 31 <i>EWSR1</i> ex8- <i>ATF1</i> ex4; 1 <i>EWSR1-CREB1</i> ; 1 <i>EWSR1-CREM</i>                                                                       |
| <b>Summary:</b>                                                                        | 178 <i>EWSR1-ATF1</i> (1 ex7-ex4; 54 ex7-ex5; 116 ex8-ex4; 1 ex8-ex5; 1 ex9-ex4; 7 ex10-ex5); 4 <i>EWSR1-CREB1</i> (2 ex7-ex7); 1 <i>EWSR1-CREM</i>    |
| <b>Current study:</b>                                                                  | 34 <i>EWSR1-ATF1</i> (1 ex7-ex4; 3 ex7-ex5; 10 ex8-ex4; 2 ex9-ex4); 5 <i>EWSR1-CREB1</i> (1 ex7-ex7); 1 <i>EWSR1-CREM</i> (1 ex8-ex7)                  |
| <b>Clear cell sarcoma-like tumor of the gastrointestinal tract</b>                     |                                                                                                                                                        |
| Antonescu 2006                                                                         | 3 <i>EWSR1</i> ex7- <i>CREB1</i> ex7                                                                                                                   |
| Stockman 2012                                                                          | 6 <i>EWSR1-ATF1</i> ; 3 <i>EWSR1-CREB1</i>                                                                                                             |
| Segawa 2018                                                                            | 1 <i>EWSR1</i> ex8- <i>ATF1</i> ex4; 1 <i>EWSR1</i> ex7- <i>CREB1</i> ex7                                                                              |
| <b>Summary:</b>                                                                        | 7 <i>EWSR1-ATF1</i> (1 ex8-ex4); 7 <i>EWSR1-CREB1</i> (4 ex7-ex7)                                                                                      |
| <b>Current study:</b>                                                                  | 10 <i>EWSR1-ATF1</i> (1 ex7-ex5; 5 ex8-ex4); 10 <i>EWSR1-CREB1</i> (1 ex6-ex6; 1 ex7-ex6; 1 ex7-ex7)                                                   |
| <b>Malignant epithelioid neoplasm with predilection for mesothelial-lined cavities</b> |                                                                                                                                                        |
| Argani 2020                                                                            | 2 <i>EWSR1-ATF1</i> ; 7 <i>EWSR1-CREM</i> (4 ex7/13/14/15-ex7); 4 <i>FUS-CREM</i> (2 ex8-ex5/7)                                                        |
| Shibayama 2021                                                                         | 2 <i>EWSR1-ATF1</i> ; 1 <i>EWSR1-CREB1</i> ; 1 <i>EWSR1</i> ex11- <i>CREM</i> ex7; 4 <i>FUS-CREM</i> (1 ex10-ex7)                                      |
| <b>Summary:</b>                                                                        | 4 <i>EWSR1-ATF1</i> ; 1 <i>EWSR1-CREB1</i> ; 8 <i>EWSR1-CREM</i> (5 ex7/11/13/14/15-ex7); 8 <i>FUS-CREM</i> (1 ex8-ex5; 1 ex8-ex7; 1 ex10-ex7)         |
| <b>Current study:</b>                                                                  | 2 <i>EWSR1-ATF1</i> ; 8 <i>EWSR1-CREM</i> ; 4 <i>FUS-CREM</i> (1 ex8-ex5; 1 ex8-ex7)                                                                   |
| <b>Mesothelioma</b>                                                                    |                                                                                                                                                        |
| Desmeules 2017                                                                         | 3 <i>EWSR1-ATF1</i> (1 ex13-ex5); 1 <i>FUS-ATF1</i>                                                                                                    |
| Ren 2021                                                                               | 1 <i>EWSR1</i> ex13- <i>ATF1</i> ex5; 1 <i>EWSR1</i> ex8- <i>ATF1</i> ex4                                                                              |
| Ajelerio 2021                                                                          | 1 <i>EWSR1-ATF1</i>                                                                                                                                    |
| <b>Summary:</b>                                                                        | 6 <i>EWSR1-ATF1</i> (1 ex8-ex4; 2 ex13-ex5); 1 <i>FUS-ATF1</i>                                                                                         |
| <b>Current study:</b>                                                                  | 7 <i>EWSR1-ATF1</i> (1 ex7-ex5; 1 ex13-ex5); 1 <i>EWSR1-CREM</i> (ex10-ex5)                                                                            |
| <b>Myxoid mesenchymal tumor or intracranial (myxoid) AFH-like tumor</b>                |                                                                                                                                                        |
| Dunham 2008                                                                            | 1 <i>EWSR1</i> ex8- <i>ATF1</i> ex4                                                                                                                    |
| Kao 2017                                                                               | 1 <i>EWSR1-ATF1</i> ; 2 <i>EWSR1-CREB1</i> ; 2 <i>EWSR1-CREM</i> (1 ex15-ex7)                                                                          |
| Sciot 2017                                                                             | 1 <i>EWSR1-ATF1</i>                                                                                                                                    |
| Bale 2018                                                                              | 2 <i>EWSR1-CREB1</i> ; 1 <i>EWSR1-CREM</i>                                                                                                             |
| Gareton 2018                                                                           | 1 <i>EWSR1</i> ex7- <i>CREM</i> ex13                                                                                                                   |
| Konstantinidis 2019                                                                    | 1 <i>EWSR1-ATF1</i> ; 1 <i>EWSR1</i> ex8- <i>CREM</i> ex4                                                                                              |
| Ballester 2020                                                                         | 1 <i>EWSR1-ATF1</i>                                                                                                                                    |
| Komatsu 2020                                                                           | 1 <i>EWSR1-CREB1</i>                                                                                                                                   |
| Ward 2020                                                                              | 1 <i>EWSR1-ATF1</i>                                                                                                                                    |
| Sloan 2021                                                                             | 8 <i>EWSR1-ATF1</i> ; 7 <i>EWSR1-CREB1</i> ; 4 <i>EWSR1-CREM</i> ; 1 <i>FUS</i> ex5- <i>CREM</i> ex7                                                   |
| Tan 2021                                                                               | 1 <i>EWSR1-CREM</i>                                                                                                                                    |
| Valente Aguiar 2021                                                                    | 1 <i>EWSR1-CREB1</i>                                                                                                                                   |
| <b>Summary:</b>                                                                        | 14 <i>EWSR1-ATF1</i> (1 ex8-ex4); 13 <i>EWSR1-CREB1</i> ; 10 <i>EWSR1-CREM</i> (1 ex7-ex13; 1 ex8-ex4; 1 ex15-ex7); 1 <i>FUS-CREM</i> (ex5-ex7)        |
| <b>Current study:</b>                                                                  | 1 <i>EWSR1-ATF1</i> ; 2 <i>EWSR1-CREB1</i> ; 2 <i>EWSR1-CREM</i>                                                                                       |
| <b>Primary pulmonary mesenchymal tumor</b>                                             |                                                                                                                                                        |
| Thway 2011                                                                             | 6 <i>EWSR1</i> ex7- <i>CREB1</i> ex7; 1 <i>EWSR1</i> ex7- <i>CREB1</i> ex8                                                                             |
| Matsukuma 2012                                                                         | 1 <i>EWSR1</i> ex7- <i>CREB1</i> ex7                                                                                                                   |
| Smith 2013                                                                             | 1 <i>EWSR1-CREB1</i>                                                                                                                                   |
| Jeon 2014                                                                              | 4 <i>EWSR1-CREB1</i> ex7                                                                                                                               |
| Yanagida 2017                                                                          | 1 <i>EWSR1</i> ex7- <i>CREB1</i> ex7                                                                                                                   |
| Prieto-Granda 2017                                                                     | 1 <i>EWSR1-CREB1</i>                                                                                                                                   |
| Chen 2020                                                                              | 1 <i>EWSR1</i> ex7- <i>CREB1</i> ex7                                                                                                                   |
| Koelsche 2020                                                                          | 1 <i>EWSR1</i> ex7- <i>CREB1</i> ex5                                                                                                                   |
| Gui 2020                                                                               | 1 <i>EWSR1</i> ex9- <i>ATF1</i> ex5                                                                                                                    |
| <b>Summary:</b>                                                                        | 17 <i>EWSR1-CREB1</i> (1 ex7-ex5; 1 ex7-ex8; 10 ex7-ex7); 1 <i>EWSR1-ATF1</i> (ex9-ex5)                                                                |
| <b>Current study:</b>                                                                  | 3 <i>EWSR1-CREB1</i> (1 ex8-ex7)                                                                                                                       |
| <b>Hyalinizing clear cell carcinoma</b>                                                |                                                                                                                                                        |

|                |                                                                                                                       |
|----------------|-----------------------------------------------------------------------------------------------------------------------|
| Antonescu 2011 | 13 <i>EWSR1-ATF1</i> (2 ex11-ex3)                                                                                     |
| Nakano 2015    | 2 <i>EWSR1ex11-ATF1ex3</i>                                                                                            |
| Chapman 2018   | 2 <i>EWSR1ex13-CREMex6</i> ; 1 <i>EWSR1ex10-CREMex6</i>                                                               |
| Hirose 2020    | 1 <i>EWSR1ex15-ATF1ex5</i>                                                                                            |
| Nojima 2021    | 1 <i>EWSR1ex7/8-ATF1ex4/5</i>                                                                                         |
| Heft Neal 2021 | 1 <i>EWSR1ex11-ATF1ex3</i> ; 1 <i>EWSR1ex6-ATF1ex4</i>                                                                |
| Summary:       | 19 <i>EWSR1-ATF1</i> (1 ex6-ex4; 1 ex7/8-ex4/5; 4 ex11-ex3; 1 ex15-ex5); 3 <i>EWSR1-CREM</i> (1 ex10-ex6; 2 ex13-ex6) |
| Current study: | 10 <i>EWSR1-ATF1</i> (1 ex7-ex4; 1 ex8-ex4; 1 ex9-ex2; 1 ex10-ex3; 3 ex11-ex3)                                        |

**Clear cell odontogenic carcinoma**

|                |                                                                                     |
|----------------|-------------------------------------------------------------------------------------|
| Bilodeau 2013  | 1 <i>EWSR1-ATF1</i>                                                                 |
| Yancoskie 2014 | 1 <i>EWSR1-ATF1</i>                                                                 |
| Vogels 2019    | 2 <i>EWSR1-ATF1</i> ; 1 <i>EWSR1ex7-CREB1ex8</i>                                    |
| Santana 2020   | 1 <i>EWSR1-ATF1</i>                                                                 |
| Breik 2021     | 1 <i>EWSR1ex9-CREMex4</i>                                                           |
| Summary:       | 5 <i>EWSR1-ATF1</i> ; 1 <i>EWSR1-CREB1</i> (ex7-ex8); 1 <i>EWSR1-CREM</i> (ex9-ex4) |
| Current study: | 1 <i>EWSR1-ATF1</i> (ex7-ex4)                                                       |

Transcripts: *ATF1* (NM\_005171); *CREB1* (NM\_134442); *CREM* (NM\_181571); *EWSR1* (NM\_005243); *FUS* (NM\_004960).

Number in front of transcript denotes number of cases positive for the fusion. Exon number is indicated whenever available.

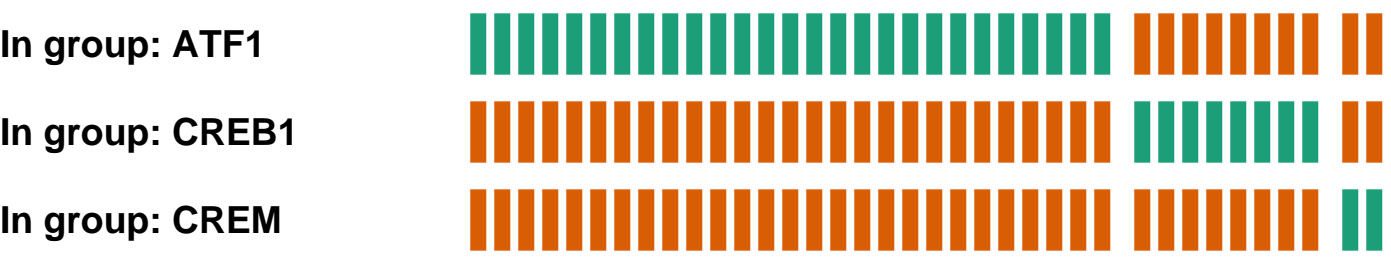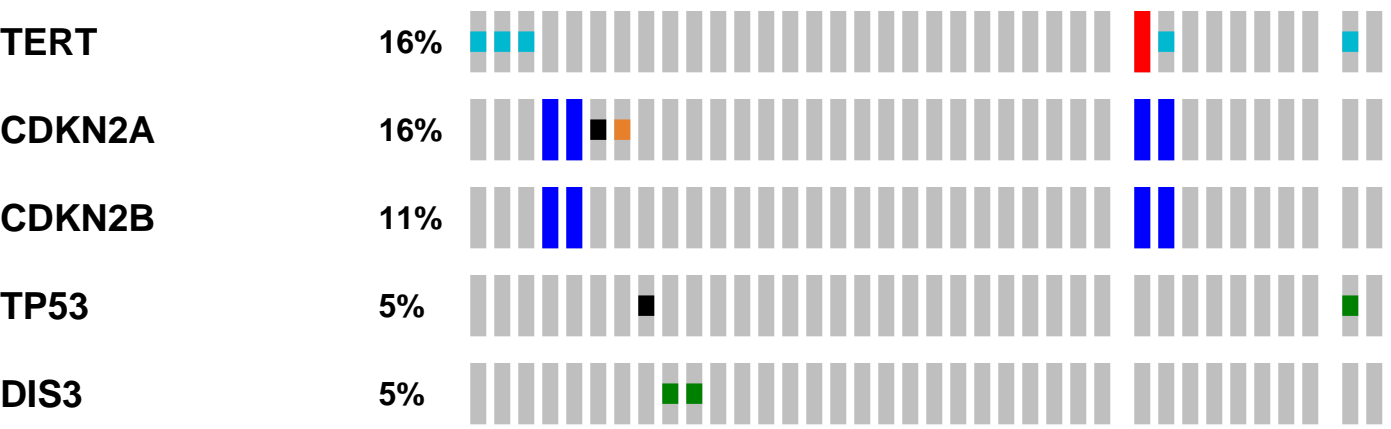

**Genetic Alteration**

- Missense Mutation (putative driver)
- Promoter Mutation
- Splice Mutation (putative driver)
- Truncating Mutation (putative driver)
- Amplification
- Deep Deletion
- No alterations

**In group: ATF1**

No Yes

**In group: CREB1**

No Yes

**In group: CREM**

No Yes



- Malign\_ep\_neoplasm
  - Mesothelioma
  - HCCC
  - AFH
  - GI\_CCS
  - CCS
  - Normal\_tissue
  - Other\_soft\_tissue\_tumors
- 
- EWS
  - EWS\_ATF1
  - EWS\_CREB1
  - EWS\_CREM
  - FUS\_ATF1

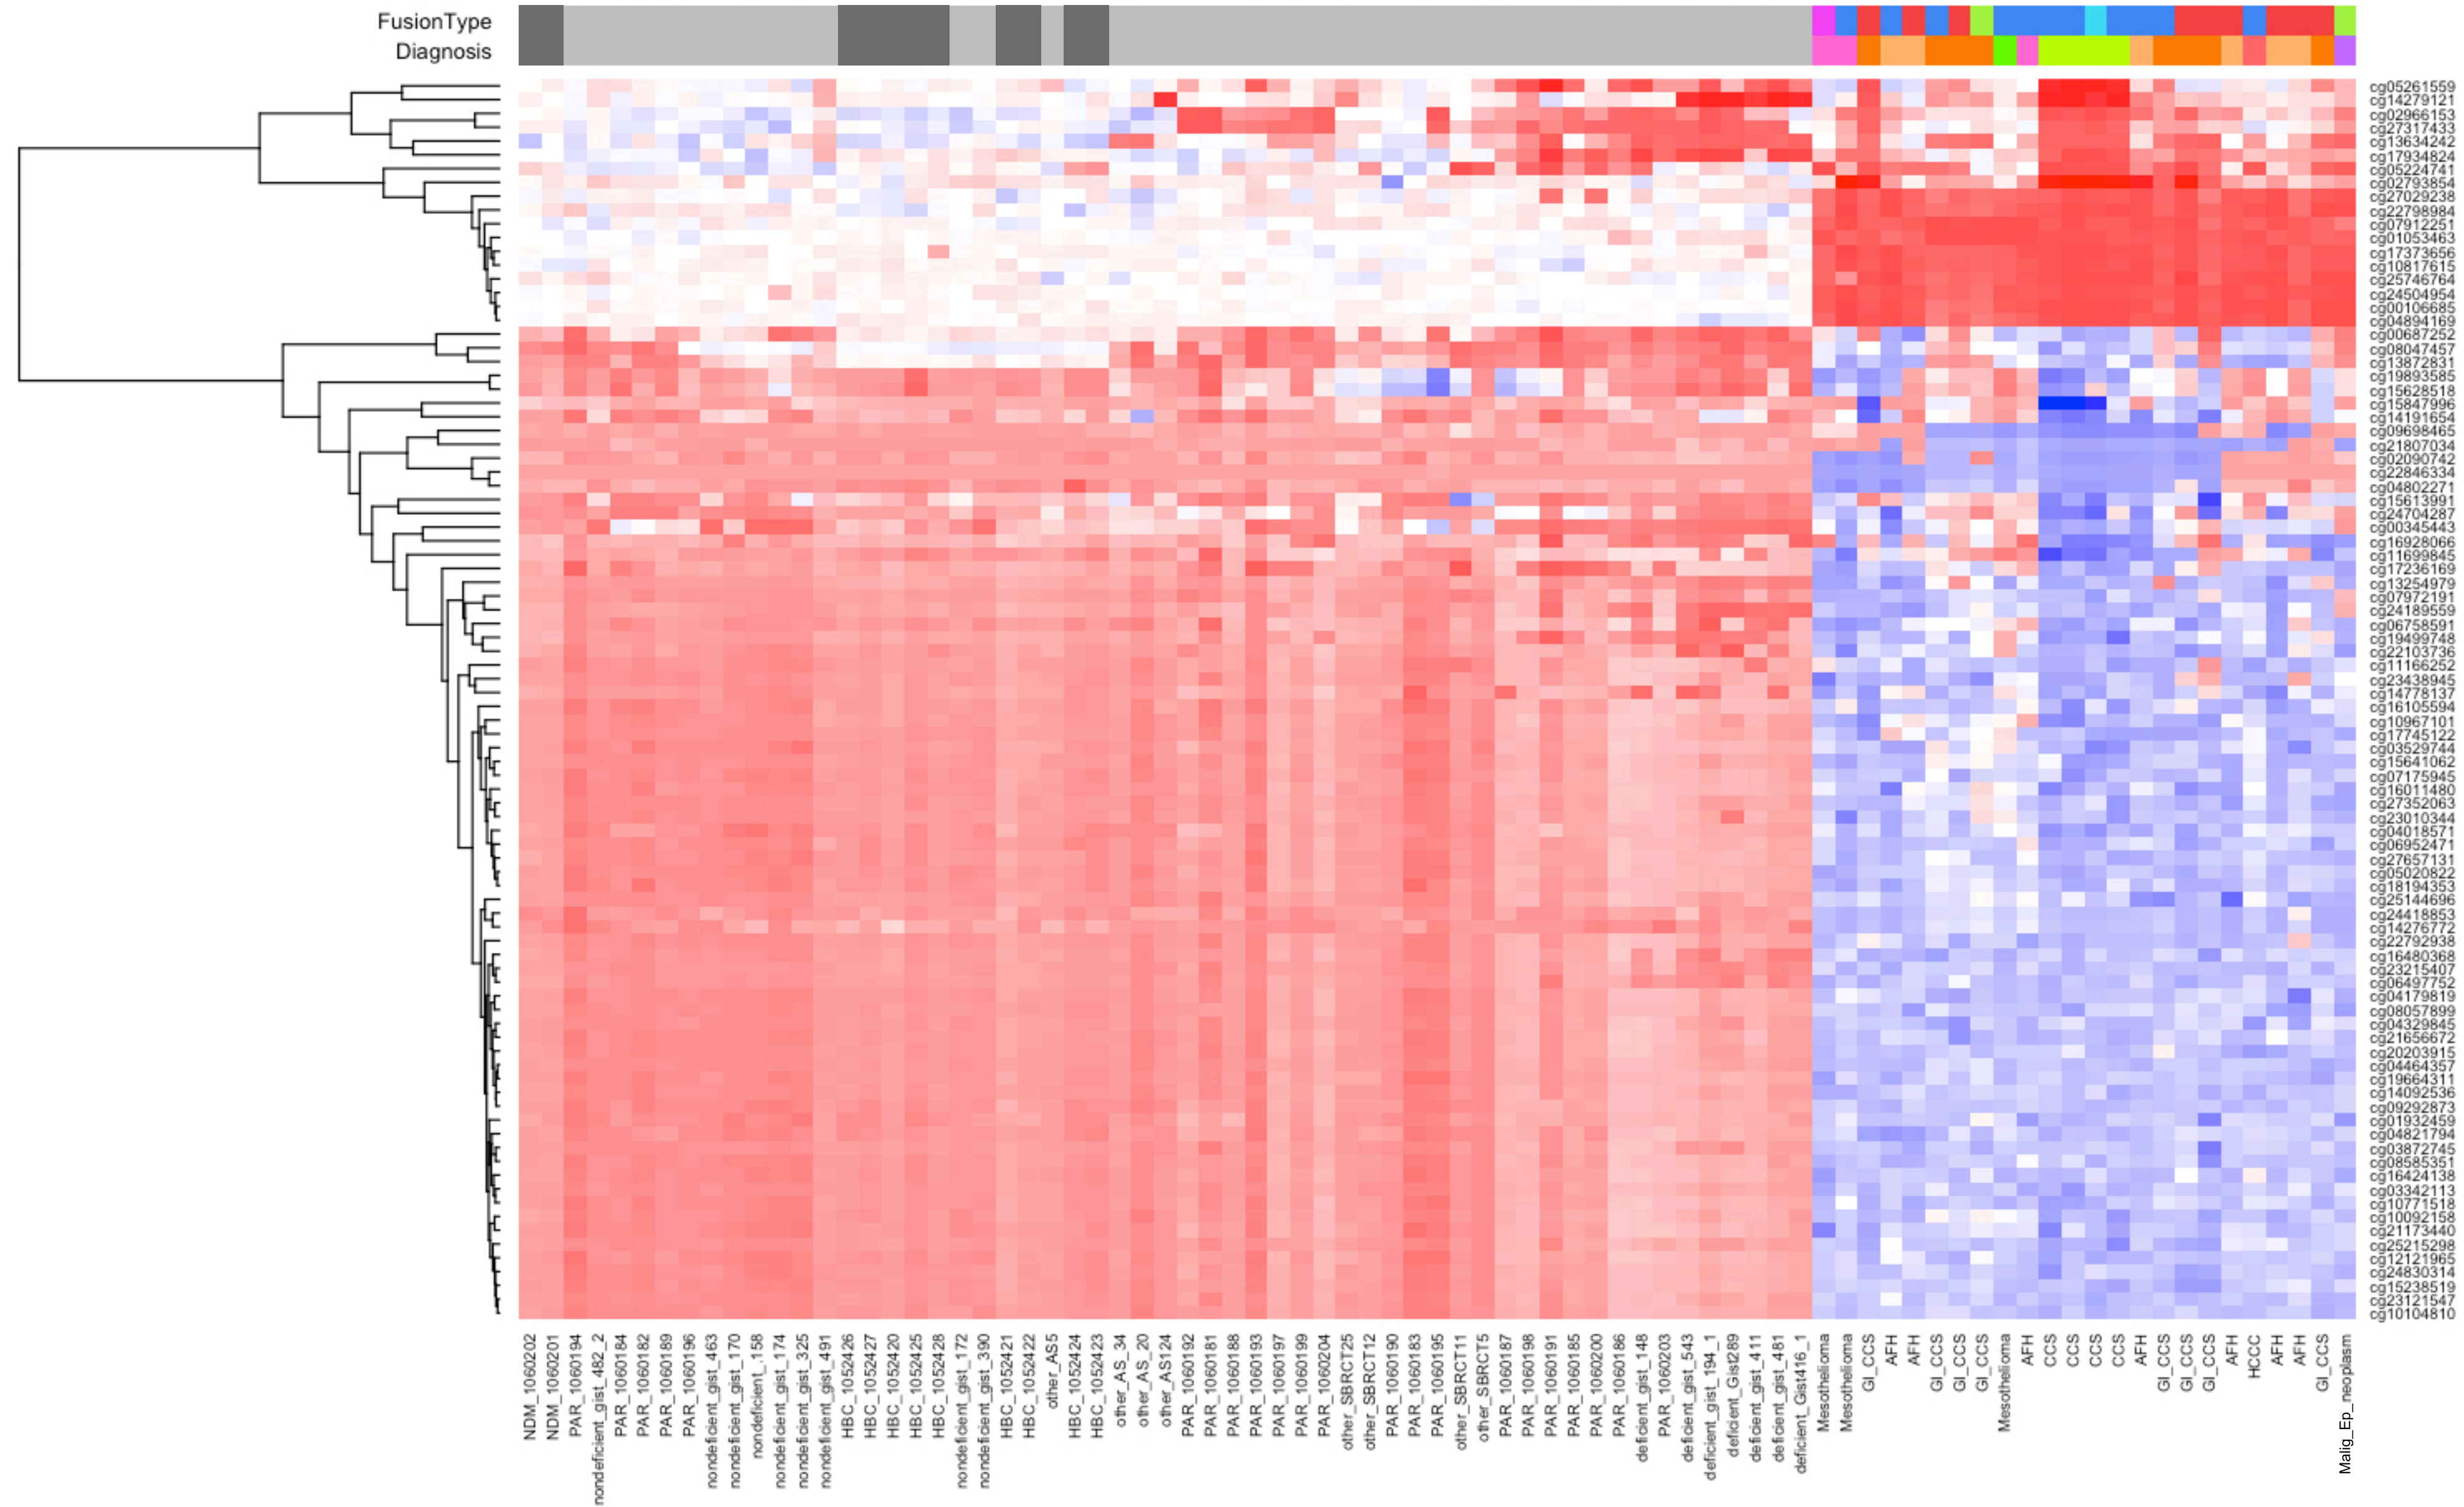

cg05261559  
 cg14279121  
 cg02966153  
 cg27317433  
 cg13634242  
 cg17934824  
 cg05224741  
 cg02793854  
 cg27029238  
 cg22798984  
 cg07912251  
 cg01053463  
 cg17373656  
 cg10817615  
 cg25746764  
 cg24504954  
 cg00106685  
 cg04894169  
 cg00687252  
 cg08047457  
 cg13872831  
 cg19893585  
 cg15628518  
 cg15847996  
 cg14191654  
 cg09698465  
 cg21807034  
 cg02090742  
 cg22846334  
 cg04802271  
 cg15613991  
 cg24704287  
 cg00345443  
 cg16928066  
 cg11699845  
 cg17236169  
 cg13254979  
 cg07972191  
 cg24189559  
 cg06758591  
 cg19499748  
 cg22103736  
 cg11166252  
 cg23438945  
 cg14778137  
 cg16105594  
 cg10967101  
 cg17451222  
 cg03529744  
 cg15641062  
 cg07175945  
 cg16011480  
 cg27352063  
 cg23010344  
 cg04018571  
 cg06952471  
 cg27657131  
 cg05020822  
 cg18194353  
 cg25144696  
 cg24418853  
 cg14276772  
 cg22792938  
 cg16480368  
 cg23215407  
 cg06497752  
 cg04179819  
 cg08057899  
 cg04329845  
 cg21656672  
 cg20203915  
 cg04464357  
 cg19664311  
 cg14092536  
 cg09292873  
 cg01932459  
 cg04821794  
 cg03872745  
 cg08585351  
 cg16424138  
 cg03342113  
 cg10742518  
 cg10092158  
 cg21173440  
 cg25215298  
 cg12121965  
 cg24830314  
 cg15238519  
 cg23121547  
 cg10104810

NDM\_1060202  
 NDM\_1060201  
 PAR\_1060194  
 nondifferent\_gist\_482\_2  
 PAR\_1060184  
 PAR\_1060182  
 PAR\_1060189  
 PAR\_1060196  
 nondifferent\_gist\_463  
 nondifferent\_gist\_170  
 nondifferent\_158  
 nondifferent\_gist\_174  
 nondifferent\_gist\_325  
 nondifferent\_gist\_491  
 HBC\_1052426  
 HBC\_1052427  
 HBC\_1052420  
 HBC\_1052425  
 HBC\_1052428  
 nondifferent\_gist\_172  
 nondifferent\_gist\_390  
 HBC\_1052421  
 HBC\_1052422  
 other\_AS5  
 HBC\_1052424  
 HBC\_1052423  
 other\_AS\_34  
 other\_AS\_20  
 other\_AS124  
 PAR\_1060192  
 PAR\_1060181  
 PAR\_1060188  
 PAR\_1060193  
 PAR\_1060197  
 PAR\_1060199  
 PAR\_1060204  
 other\_SBRCT25  
 other\_SBRCT12  
 PAR\_1060190  
 PAR\_1060183  
 PAR\_1060195  
 other\_SBRCT11  
 other\_SBRCT5  
 PAR\_1060187  
 PAR\_1060198  
 PAR\_1060191  
 PAR\_1060185  
 PAR\_1060200  
 PAR\_1060186  
 deficient\_gist\_148  
 PAR\_1060203  
 deficient\_gist\_543  
 deficient\_gist\_194\_1  
 deficient\_gist289  
 deficient\_gist\_411  
 deficient\_gist\_481  
 deficient\_gist416\_1  
 Mesothelioma  
 Mesothelioma  
 GI\_CCS  
 AFH  
 AFH  
 AFH  
 GI\_CCS  
 GI\_CCS  
 GI\_CCS  
 Mesothelioma  
 AFH  
 AFH  
 CCS  
 CCS  
 CCS  
 CCS  
 AFH  
 GI\_CCS  
 GI\_CCS  
 GI\_CCS  
 AFH  
 HCCC  
 AFH  
 AFH  
 GI\_CCS  
 Malign\_Ep\_neoplasm
